# Supplementary material
Source: HighWire-hosted journal article supplement (http://www.jneurosci.org/highwire/filestream/598855/field_highwire_adjunct_files/2/Supplemental_Table_1_cell_surf_chaps_brain_tumors.pdf)
Supplement: Supplemental_Table_1_cell_surf_chaps_brain_tumors.pdf [file Supplemental_Table_1_cell_surf_chaps_brain_tumors.pdf]

**Supplemental Table 1**  
**Cell surface chaperone protein/heat shock protein expression on brain tumor cell lines and xenografts**

| Cell Line or Xenograft | Antibody Target |       |       |       |       |        |        |       |       |        |     |     |      |
|------------------------|-----------------|-------|-------|-------|-------|--------|--------|-------|-------|--------|-----|-----|------|
|                        | HSP27           | HSP60 | HSP70 | HSC70 | HSP90 | HSP110 | HspBP1 | GRP78 | GRP94 | GRP170 | ABC | CRT | TRP1 |
| <i>Cell Line</i>       |                 |       |       |       |       |        |        |       |       |        |     |     |      |
| D54MG                  | +               | +     | +     | +     | —     | +      | +      | +     | +     | +      | +   | +   | +    |
| D247MG                 | +               |       | +     | +     |       | +      | +      | +     | +     | +      | +   |     | +    |
| D392MG                 | +               |       | +     | +     |       | +      |        | +     | —     | +      | +   |     |      |
| D283MED                | +               |       |       |       |       |        |        |       |       |        |     |     |      |
| D341MED                | +               | +     | +     | +     | +     | +      | +      | +     | —     | +      | +   | +   | —    |
| DAOY                   | +               |       | +     | +     |       | +      | +      | +     |       | +      | +   |     |      |
| U251                   |                 |       | +     |       |       |        |        |       |       |        |     |     |      |
| T98G                   | +               |       | +     |       |       |        |        |       |       |        |     |     |      |
| CHP-212                | +               |       | +     |       |       |        |        |       |       |        |     |     |      |
| <i>Xenograft</i>       |                 |       |       |       |       |        |        |       |       |        |     |     |      |
| D212MG                 | +               |       |       |       |       |        |        |       |       |        |     |     |      |
| D256MG                 |                 |       | +     |       |       |        |        |       |       |        |     |     |      |
| D456MG                 |                 |       | +     |       |       |        |        |       |       |        |     |     |      |
| H2159MG                | +               |       | +     |       |       |        |        |       |       |        |     |     |      |
| D341MED                | +               |       |       |       |       |        |        |       |       |        |     |     |      |
| D283MED                | +               |       | +     |       | +     |        | +      |       |       |        |     |     |      |
| D556MED                |                 |       | +     |       |       |        |        |       |       |        |     |     |      |
| D612EP                 | +               |       |       |       |       |        | +      |       |       |        |     |     |      |
| XD1-0                  | +               |       | +     |       |       |        | +      |       |       |        |     |     |      |
| XD5-21                 | +               |       | +     |       |       |        | +      |       |       |        |     |     |      |
| XD1-4                  | +               |       | +     |       |       |        | +      |       |       |        |     |     |      |
| XD4-3                  | +               |       | +     |       |       |        | —      |       |       |        |     |     |      |
| <i>Murine</i>          |                 |       |       |       |       |        |        |       |       |        |     |     |      |
| NR6M                   |                 |       | +     |       |       |        |        |       |       |        |     |     |      |
| SMA560                 | +               |       | +     | +     |       | +      | +      | +     |       | +      | +   |     |      |

Abbreviations: HSP, heat shock protein; HSC, heat shock cognate; GRP, glucose-regulated protein; ABC, alpha B-crystallin; CRT, calreticulin; TRP1, TRAP-1, TNF receptor-associated protein (HSP90 homologue),

Key: + = Mean fluorescent intensity (MFI) of the test population is at least 50% greater than that of the isotype control.

— = MFI of test population is similar or overlapping with that of the isotype control.

Blank = untested
